# Supplementary material for: Activation of NF-κB/ALDH1A1 Signaling Promotes Non-Mutational Resistance to EGFR-TKIs in Non-Small Cell Lung Cancer
Source: Research Square preprint supplement (doi:10.21203/rs.3.rs-6132050/v1), 2025-03-11
Supplement: Supplementary file 1 [file 227c5e46516f99ef129cd405.docx]

**Supplementary Table 1. The clinicopathological characteristics of the cases and LCOs subtype**

| Oranoid  line | SEX | Age | Tumor type | Tumor location | pT | pN | cM | stage | Mutation |
| --- | --- | --- | --- | --- | --- | --- | --- | --- | --- |
|  | Female | 65 | LC | Lung | cT2a | N2 | M1a | Ⅳa | EGFR L858R |
|  | Female | 60 | LC | Lung | cT1 | N0 | M1c | Ⅳb | EGFR 19del |
|  | Male | 52 | LC | Lung | T2a | N3 | M1c | Ⅳb | EGFR L858R |
|  | Female | 69 | LC | Lung | cT4 | N3 | M1a | Ⅳ | EGFR L858R |
|  | Male | 80 | LC | Lung | cT3 | N3 | M1a | Ⅳa | EGFR L858R |
|  | Female | 67 | LC | Lung | cT2b | N2 | M1b | Ⅳa | EGFR 19del |
|  | Female | 56 | LC | Lung | pT1b | N0 | M0 | ⅠA2 | EGFR 19del |
|  | Female | 40 | LC | Lung | pT1b | N0 | M0 | ⅠA2 | EGFR L858R |
| LCO1 | Female | 56 | LC | Lung | pT2a | N0 | M0 | ⅠB | EGFR 19del |
| LCO2 | Female | 78 | LC | Lung | cT4 | N2 | M1c | Ⅳb | EGFR 19del |
| LCO3 | Male | 76 | LC | Lung | pT2a | N0 | M0 | ⅠB | EGFR 19del |
|  | Female | 74 | LC | Lung | pT2a | N2a | M0 | Ⅲa | EGFR 19del |
|  | Female | 61 | LC | Lung | pT1b | N0 | M0 | ⅠA2 | EGFR 19del |
|  | Female | 75 | LC | Lung | cT2b | N1 | M1 | ⅣA | EGFR 19del |
|  | Female | 81 | LC | Lung | pT2a | N0 | M0 | ⅠB | EGFR 19del |
|  | Female | 61 | LC | Lung | T4 | N0 | M1 | Ⅳ | EGFR 19del |
|  | Male | 66 | LC | Lung | pT1b | N0 | M0 | ⅠA2 | EGFR 19del |
|  | Male | 73 | LC | Lung | pT1b | N0 | M0 | ⅠA2 | EGFR 19del |

**Supplementary Table 2. The detailed information on antibodies**

| **Antibodies** | **Source** | **Application** |
| --- | --- | --- |
| NF-κB | Cell Signaling Technology (Cat #8242) | 1:1000 for WB  1:100 for IHC  1:100 for Chip |
| p-NF-κB | Cell Signaling Technology (Cat #3033) | 1:1000 for WB  1:1000 for IF |
| KI67 | ABclonal (Cat #A20018) | 1:200 for IF |
| MDR1 | Abcam (Cat #Ab71916) | 1:1000 for IF |
| β-actin | Abcam (Cat #Ab8146) | 1:5000 for WB |
| Lamin B | Proteintech (Cat #12987-1-AP) | 1:5000 for WB |
| CEA | Abcam (Cat #ab133633) | 1:500 for IF |
| CK20 | ABclonal (Cat #A1629) | 1:100 for IHC |
| TIFF1 | Abcam(Cat #Ab204411) | 1:500 for IHC |
| CK7 | Abcam(Cat #Ab181598) | 1:8000 for IHC |
| ALDH1A1 | ABclonal(Cat #A1802) | 1:500 for WB  1:200 for IF |
| Caspase 3 | Cell Signaling Technology (Cat #9662) | 1:1000 for WB |
| Cleaved Caspase-3 | Cell Signaling Technology (Cat #9664) | 1:1000 for WB |
| PARP | Cell Signaling Technology (Cat #9542) | 1:1000 for WB |
| Cleaved PARP | Cell Signaling Technology (Cat #5625) | 1:1000 for WB |
| PARP | Cell Signaling Technology (Cat #9532) | 1:1000 for WB |

**Supplementary Table 3: Target Sequences of lentivirus**

| **Name** | **Target sequences** |
| --- | --- |
| Negative Control Scramble | TTCTCCGAACGTGTCACGT |
| shRELA | GATTGAGGAGAAACGTAAA |
| shALDH1A1#1 | GCACCGATTTGAAGATTCAATA |
| shALDH1A1#2 | GCTGATTTAATCGAAAGAGAT |

**Supplementary Table 4 : The primers for ChIP-PCR**

| **Gene name** |  | **Sequences** |
| --- | --- | --- |
| ALDH1A1 promoter | Forward | 5’-GTCCAAACACAGAGGGAGTTG-3’ |
| Reverse | 5’-GTTTATTTACACGTGGCTTTAAACA-3’ |

**Supplementary Table 5: The sequences of primers for RT-qPCR**

| Genes | Accession # | Sequences of Primers |
| --- | --- | --- |
| GAPDH | NM_002046.7 | Forward: 5’-AAGGTGAAGGTCGGAGTCAAC-3’  Reverse: 5’-GGGGTCATTGATGGCAACAATA-3’ |
| RELA | NM_001145138.2 | Forward: 5’-TGTGAAGAAGCGGGACCTGGAG-3’  Reverse: 5’-AAGCAGAGCCGCACAGCATTC-3’ |
| ABCG2 | NM_001257386.2 | Forward: 5’-GCAGCAGGTCAGAGTGTGGTTTC-3’  Reverse:5’-ACTGAAGCCATGACAGCCAAGATG-3’ |
| KLF4 | [NM_001314052.2](https://www.ncbi.nlm.nih.gov/nuccore/NM_001314052.2) | Forward: 5’-TGACTGGGACGGCTGTGGATG-3’  Reverse: 5’-CTTCATGTGTAAGGCGAGGTGGTC-3’ |
| EPCAM | [NM_002354.3](https://www.ncbi.nlm.nih.gov/nuccore/NM_002354.3) | Forward: 5’-AAGGCCAAGCAGTGCAACGG-3’  Reverse: 5’-TCCAGTAGGTTCTCACTCGCTCAG-3’ |
| SOX9 | NM_000346.4 | Forward: 5’-CACACGCTGACCACGCTGAG-3’  Reverse: 5’-GCTGCTGCTGCTCGCTGTAG-3’ |
| CD133 | NM_001145847.2 | Forward: 5’-GTGGCGTGTGCGGCTATGAC-3’  Reverse:5’-CCAACTCCAACCATGAGGAAGACG-3’ |
| AXIN2 | NM_001363813.1 | Forward: 5’-CACCACCACCACCACCATTCG-3’  Reverse:5’-ACATGCTTCGTCGTCTGCTTGG-3’ |
| ALDH1A1 | NM_000689.5 | Forward:5’-ACGCCAGACTTACCTGTCCTACTC-3’  Reverse:5’-TCTTGCCACTCACTGAATCATGCC-3’ |
| NANOG | NM_001297698.2 | Forward:5’-AGATGCCTCACACGGAGACTG-3’  Reverse:5’-GGGTTGTTTGCCTTTGGGACTG-3’ |
