# Supplementary material for: Activation of NF-κB/ALDH1A1 Signaling Promotes Non-Mutational Resistance to EGFR-TKIs in Non-Small Cell Lung Cancer
Source: Research Square preprint supplement (doi:10.21203/rs.3.rs-6132050/v1), 2025-03-11
Supplement: Supplementary file 2 [file a04ea16fb519fafd5df19cf0.docx]

**Supplemental figures**


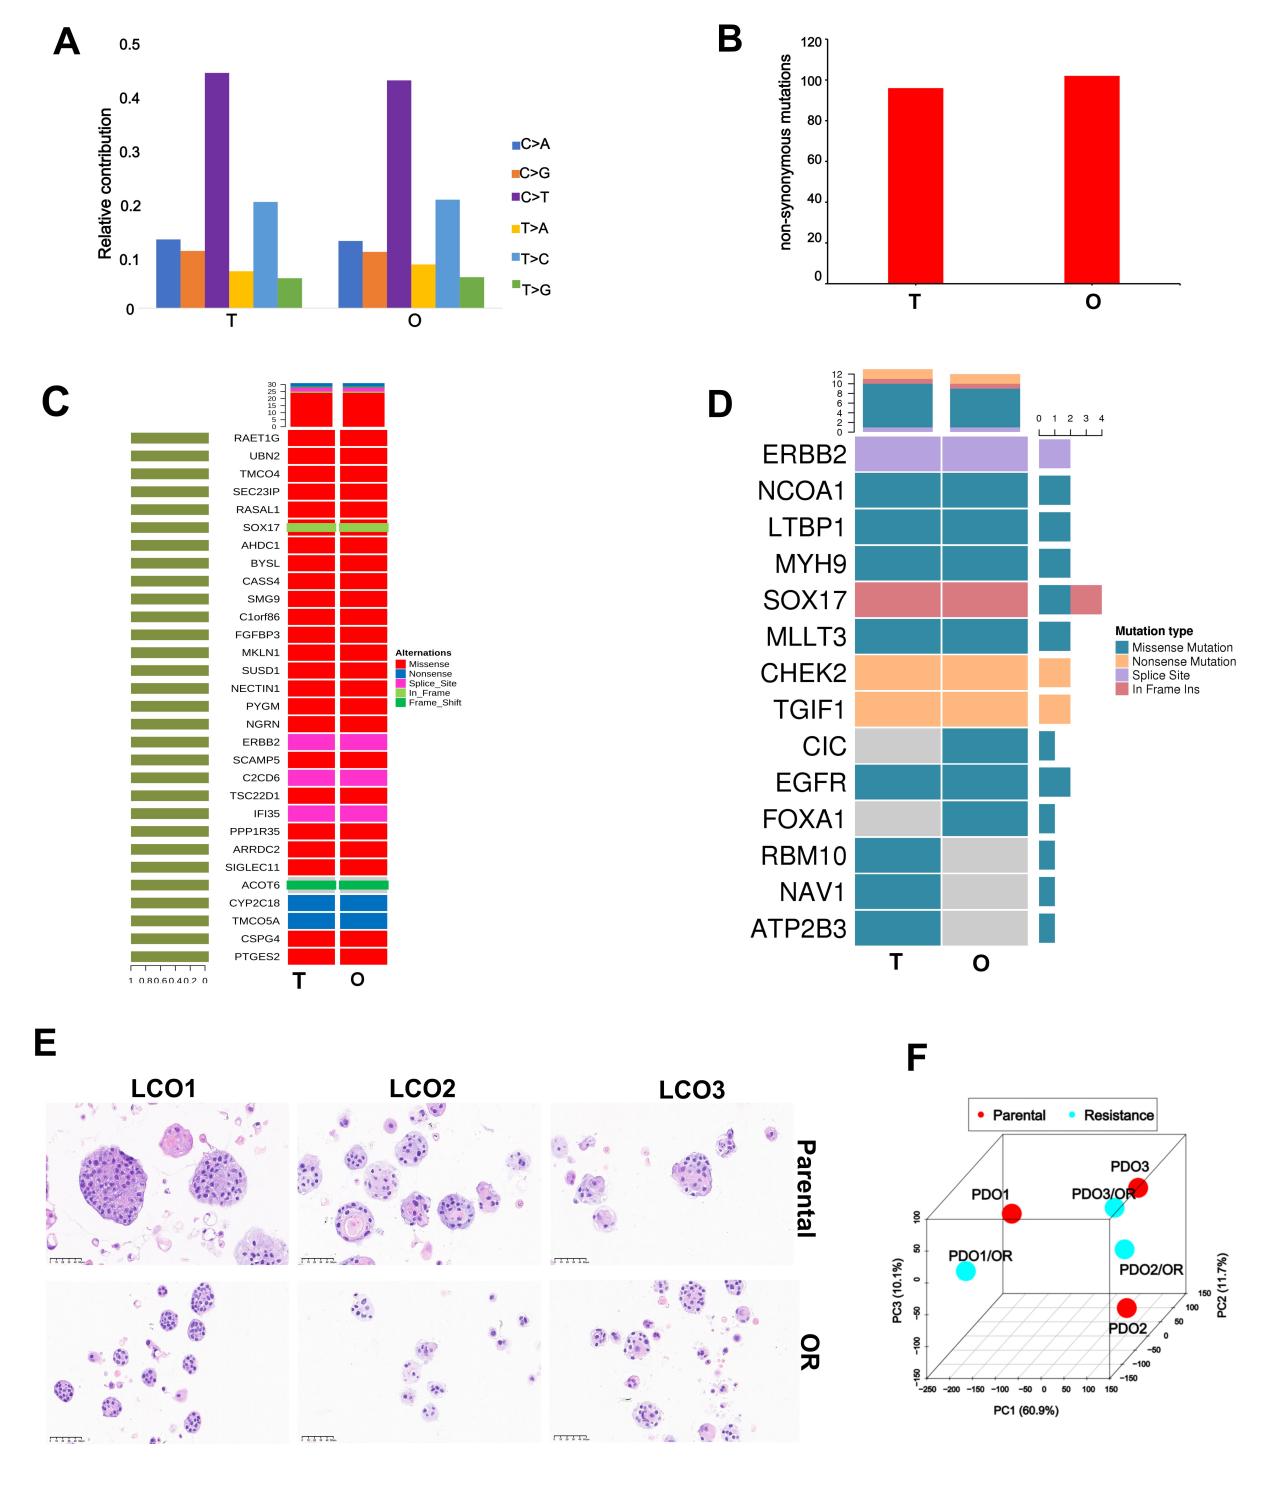


**Supplemental Figure 1. Consistency verification of LCOs. A.** The frequency of point mutation types in the LCOs and paired tumor. **B.** Tumor mutation burden (TMB) was estimated in the LCOs and paired tumor. **C.** The high-frequency mutations in organoid lines (O) and the corresponding tissues (T). **D.** Heatmap of CNVs in cancer driver genes. Gene copy numbers are transformed as log2 ratios per gene. **E.** HE staining analysis ofmorphological consistency of LCOs and LCOs/OR. O, LCOs; T, patients’ primary specimens, Scale bar = 50 μm. **F.** The PCA analysis of LCOs and LCOs/OR.


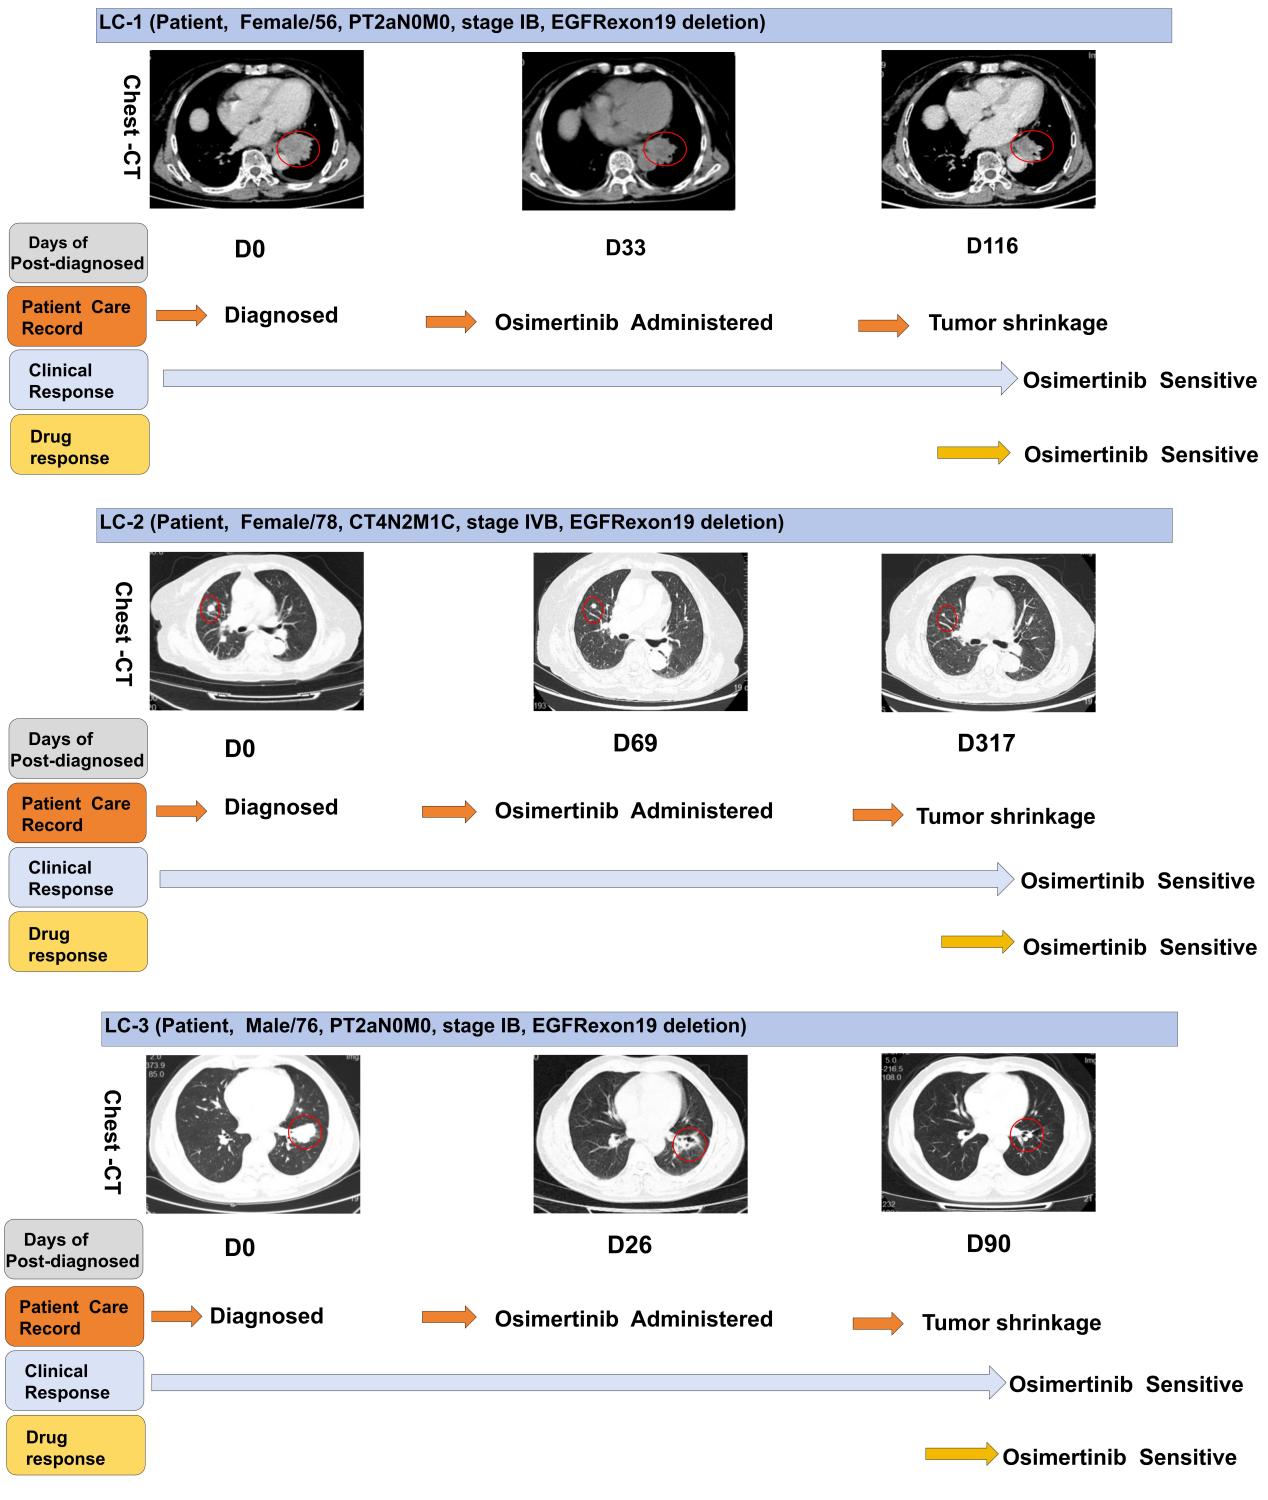


**Supplemental Figure 2. LCO models predict clinical outcomes of three patients to targeted therapy**. Patient #1 was diagnosed with stage IB lung cancer harboring an EGFR exon 19 deletion, and exhibited a notable reduction in tumor size following treatment with Osi. Consequently, drug sensitivity testing with LCO1 exhibited a sensitive response to Osi. Patients #2 and #3 were diagnosed with an EGFR exon 19 deletion, and also had significant lesion reduction after Osi treatment. Drug sensitivity tests displayed a robust positive response to Osi. The areas enclosed by the red circles represent the tumors before and after chemotherapy, as indicated by enhanced CT scans.


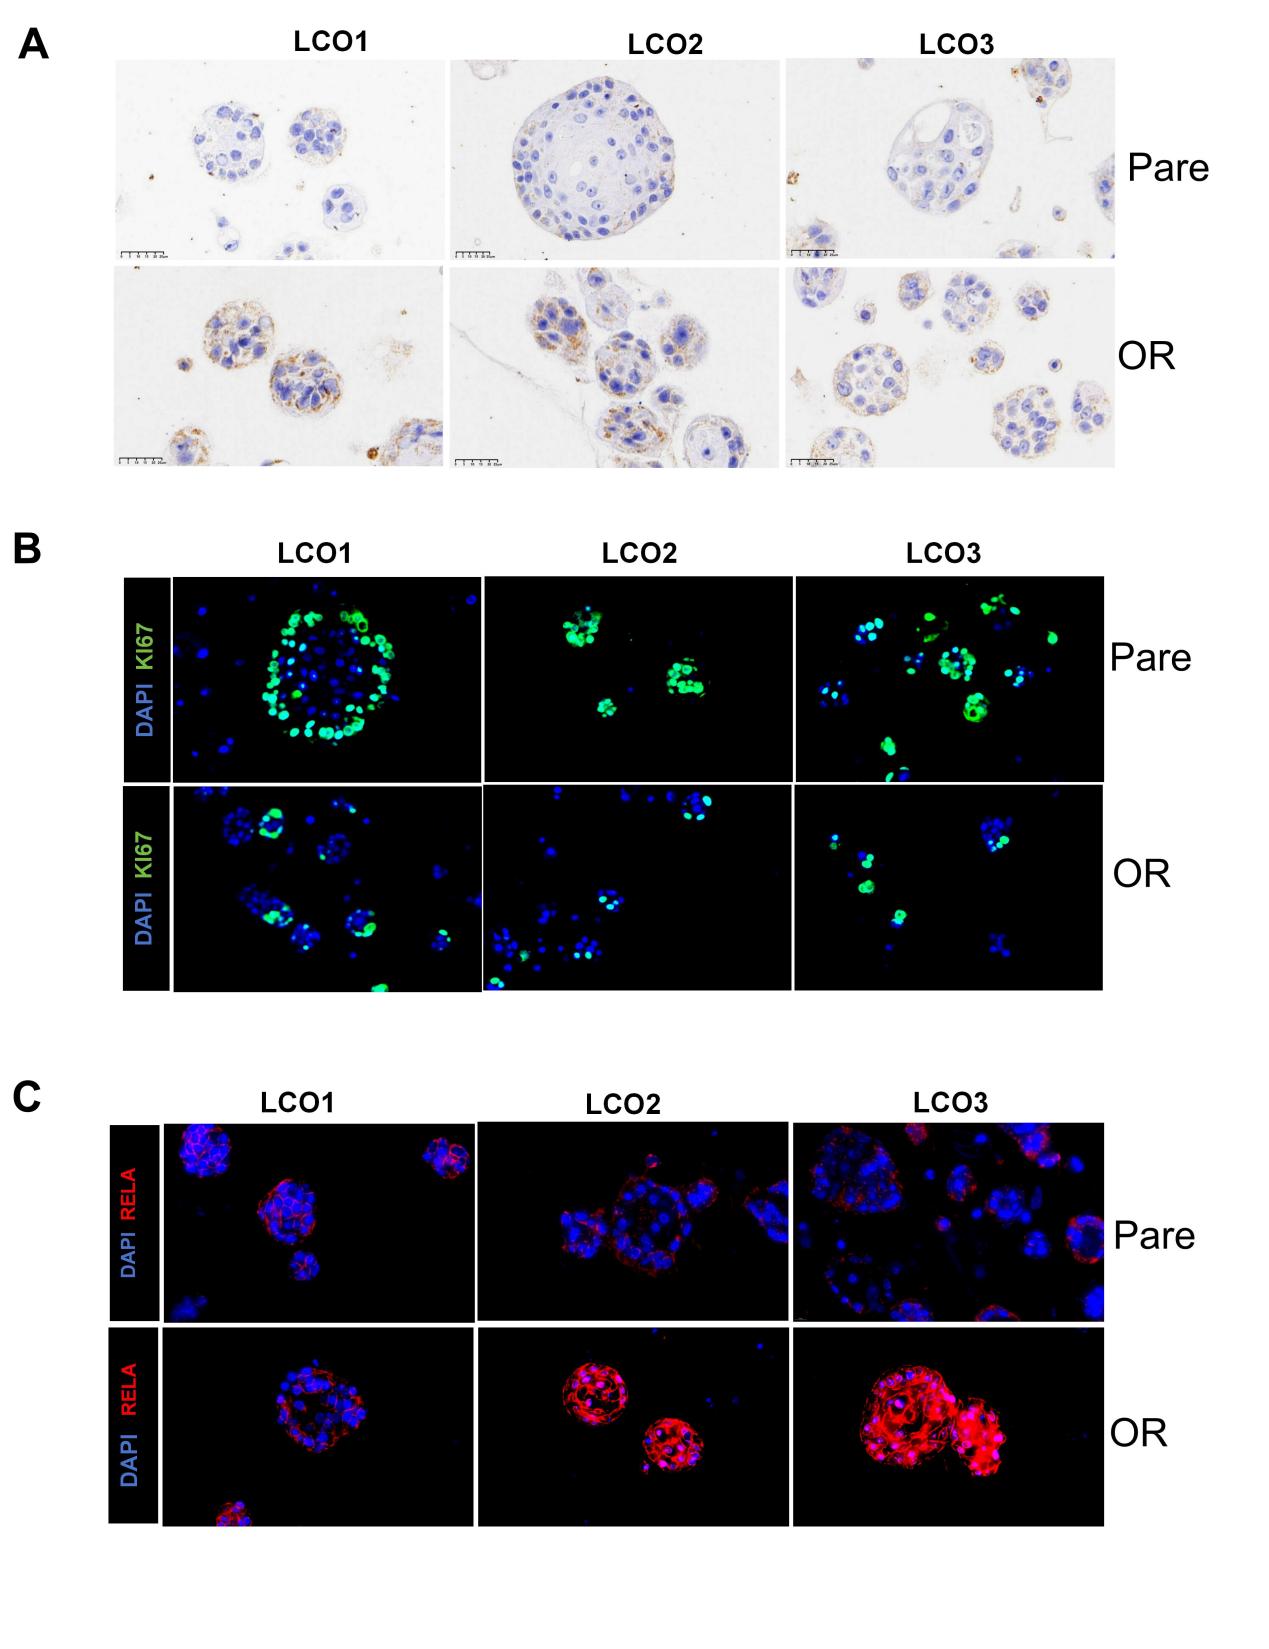


**Supplemental Figure 3.** Immunohistochemistry analysis of the expression of MDR1 (A), and immunofluorescence analysis of KI67 (B) and RELA (C) expression in LCO1-3 and LCO/OR1-3 (magnification x200).


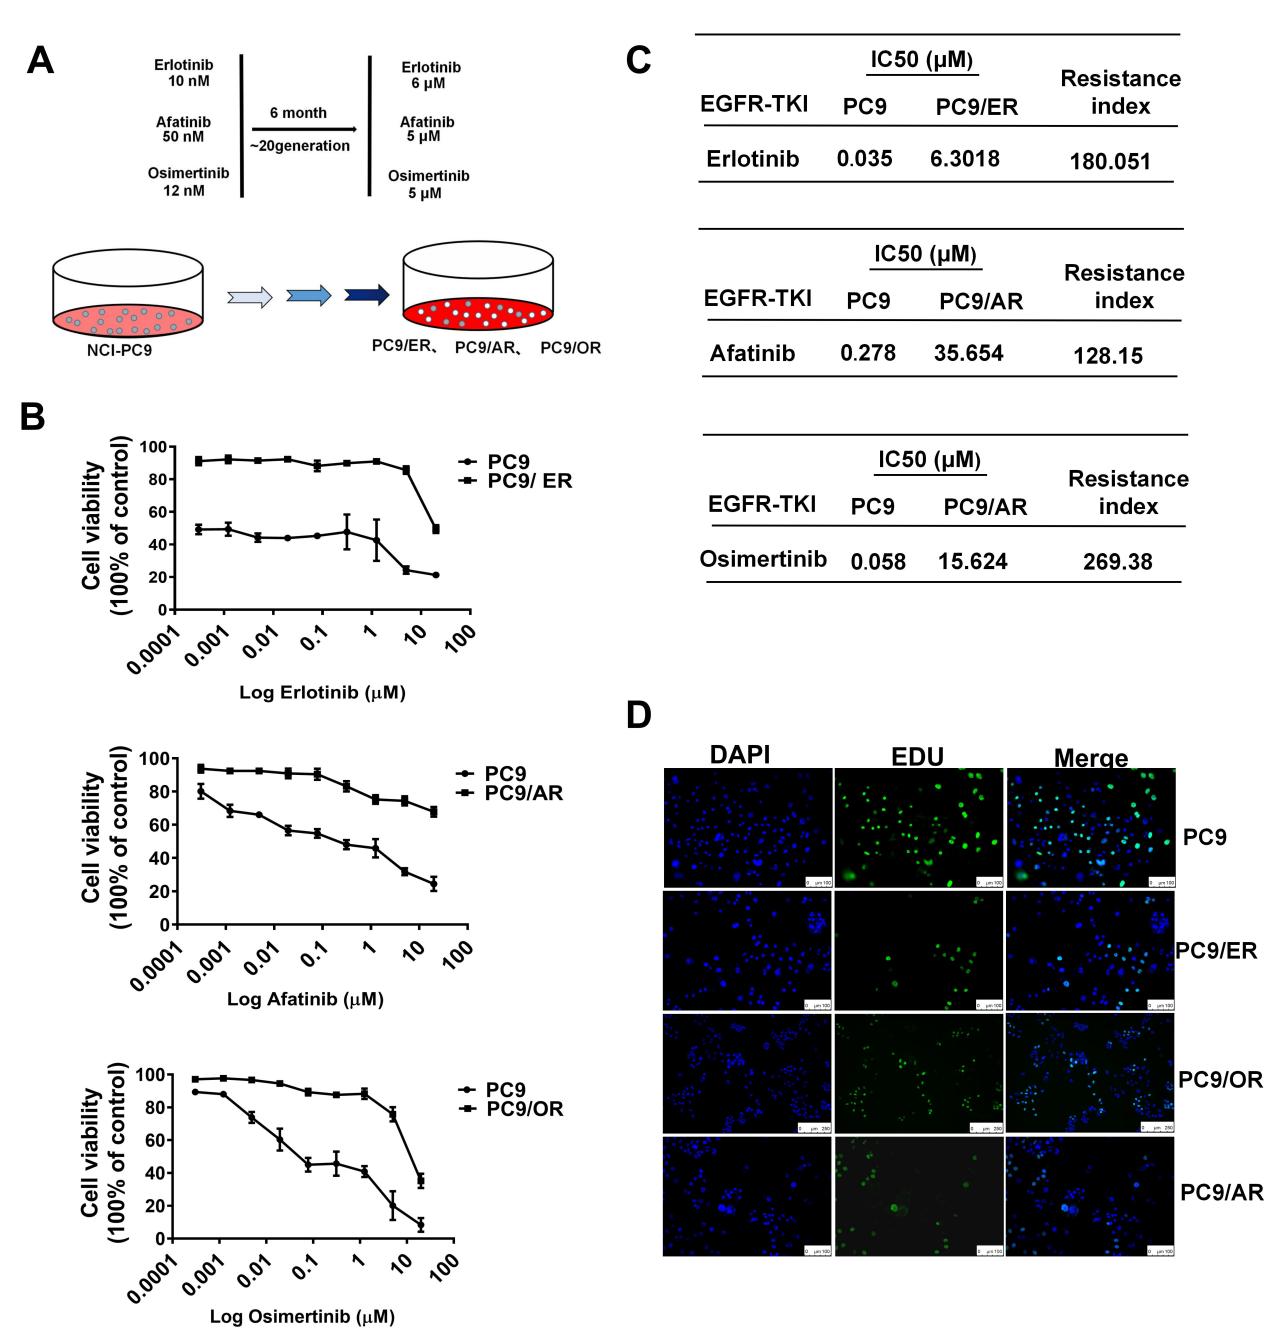


**Supplemental Figure 4.** **Establishment of EGFR-TKI resistant R-PC9 cells in vitro.** **A.** A schematic diagram illustrated the establishment of EGFR-TKI resistant R-PC9 cells. **B.** CCK8 assay analysis of the effect of TKI treatment for 72h on the viability of indicated cell lines. Each value is expressed as the mean ± SD (n=3). **C.** The IC50 values of EGFR-TKIs in PC9, PC9/ER, PC9/AR and PC9/OR cells. **D.** The representative photographs of cells in the EDU assay, Scale bar = 100 μm.


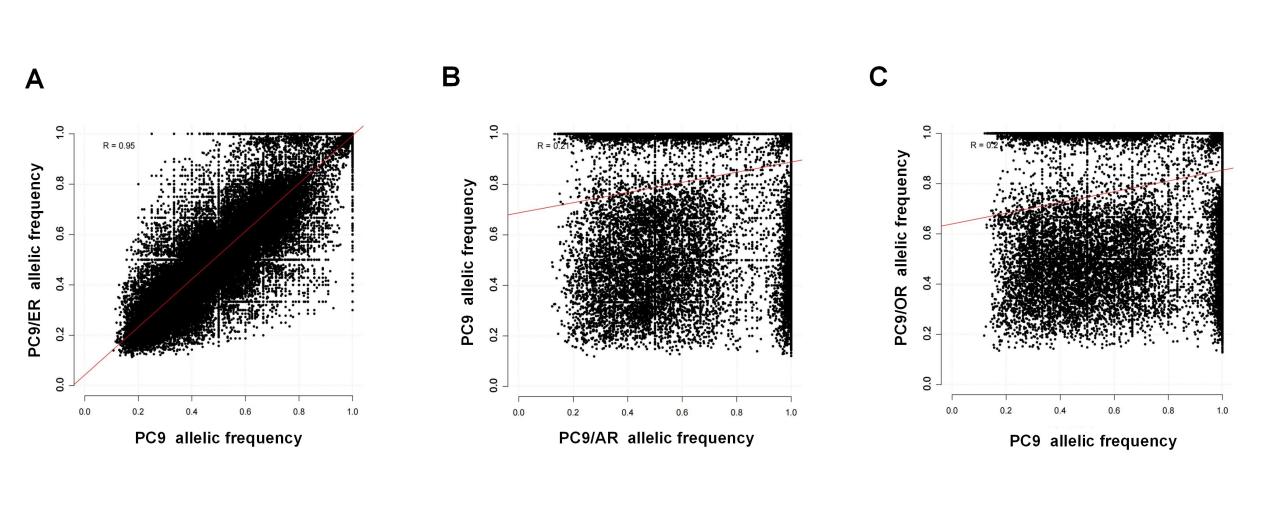
**Supplemental Figure 5.** Two-dimensional density plot of single-nucleotide variant allelic frequencies from WES of PC9/ER (A), PC9/AR (B) and PC9/OR (C) versus treatment-naive PC9 cells.


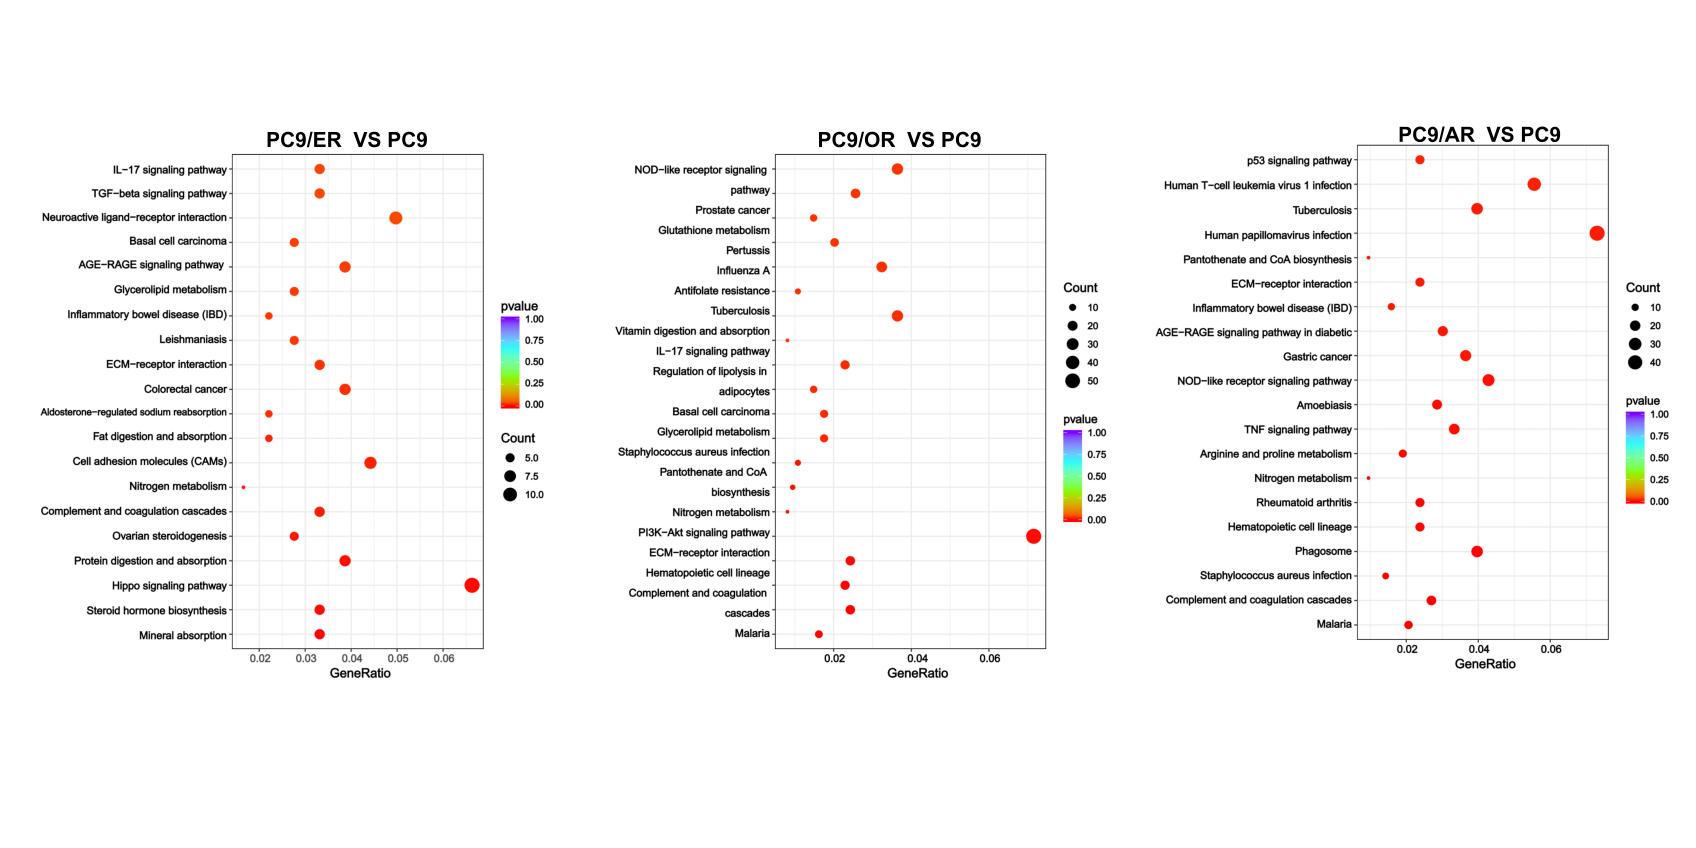
**Supplemental Figure 6.** KEGG analysis of the enriched pathways by the DEGs between cells after RNA-seq analysis. Enriched KEGG pathways, enrichment analysis of upregulated genes in PC9/AR, PC9/ER and PC9/OR.


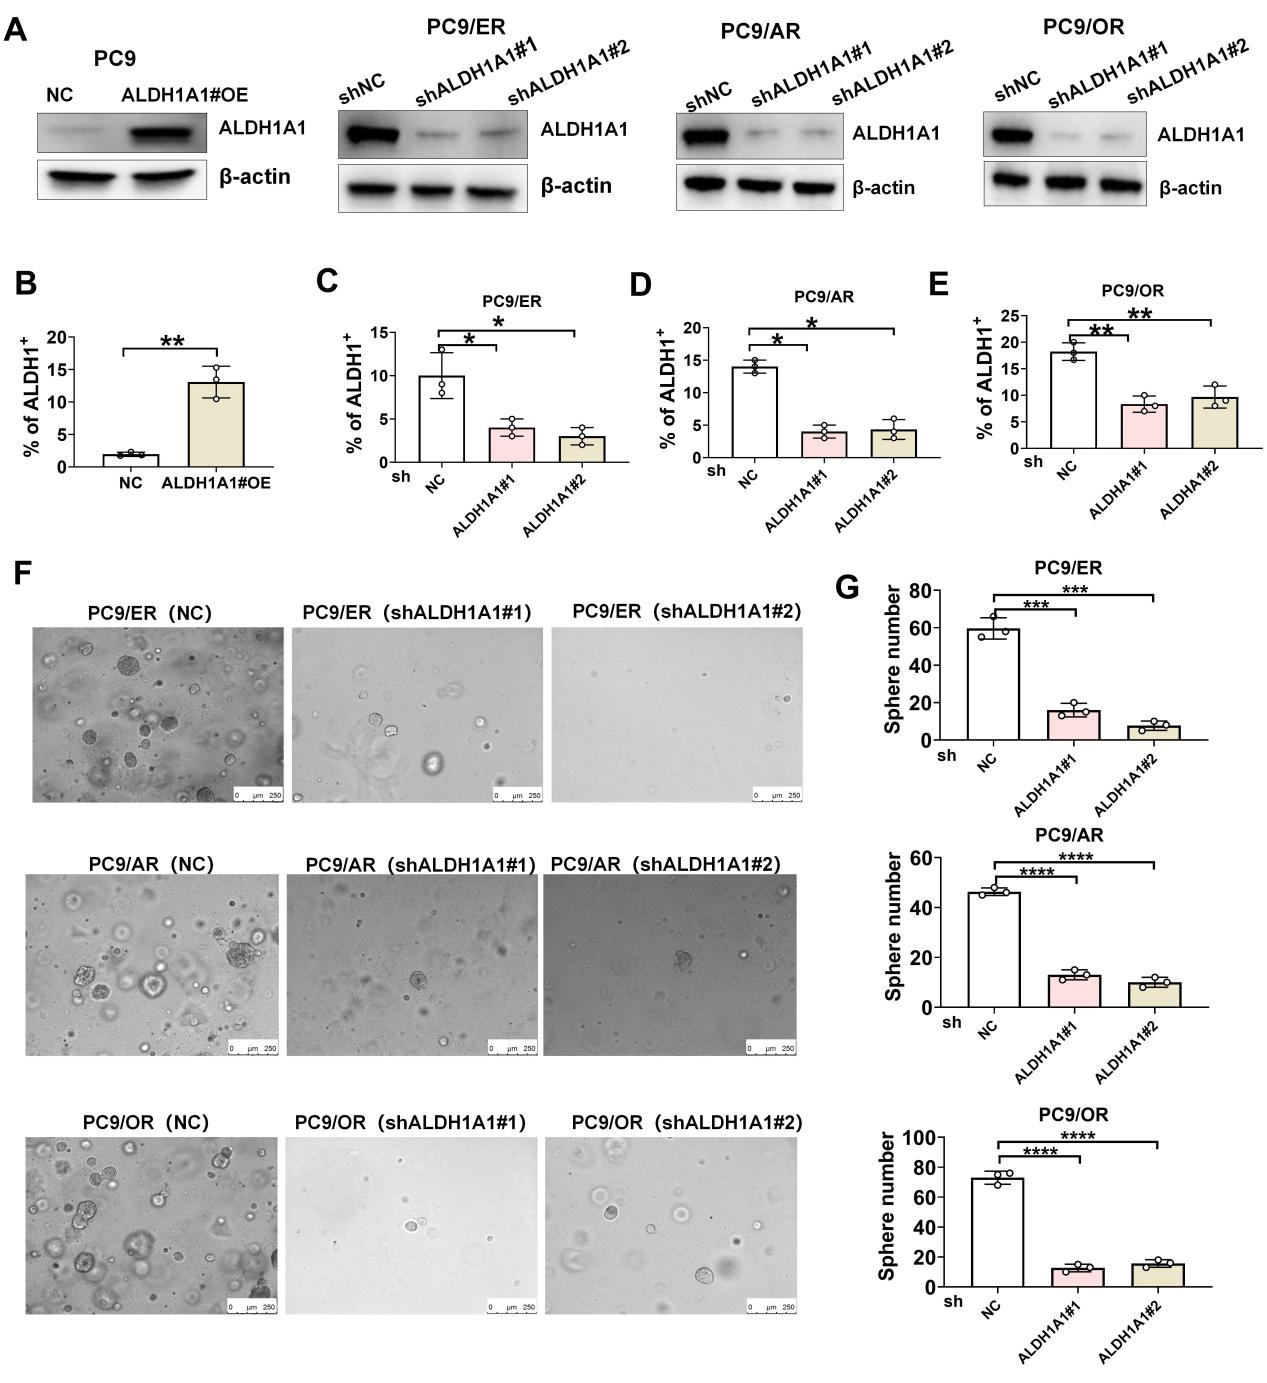


**Supplemental Figure 7. Altered ALDH1A1 expression modulates the sphere formation of tumor cells.** **A.** Western blot analysis of the efficacy of ALDH1A1 over-expressing or silencing cells. **B.** ALDH1A1 over-expression increased the proportion of ALDH1+ cells in PC9 cells. **C-E.** ALDH1A1 silencing decreased the proportion of ALDH1+ cells in PC9/ER (C), PC9/AR (D) and PC9/OR (E). **F-G.** ALDH1A1 silencing dramatically mitigated the sphere formation of R-PC9 cells. **P*<0.05; ***P*<0.01; ****P*<0.001; *****P*<0.0001; ns, no significant.


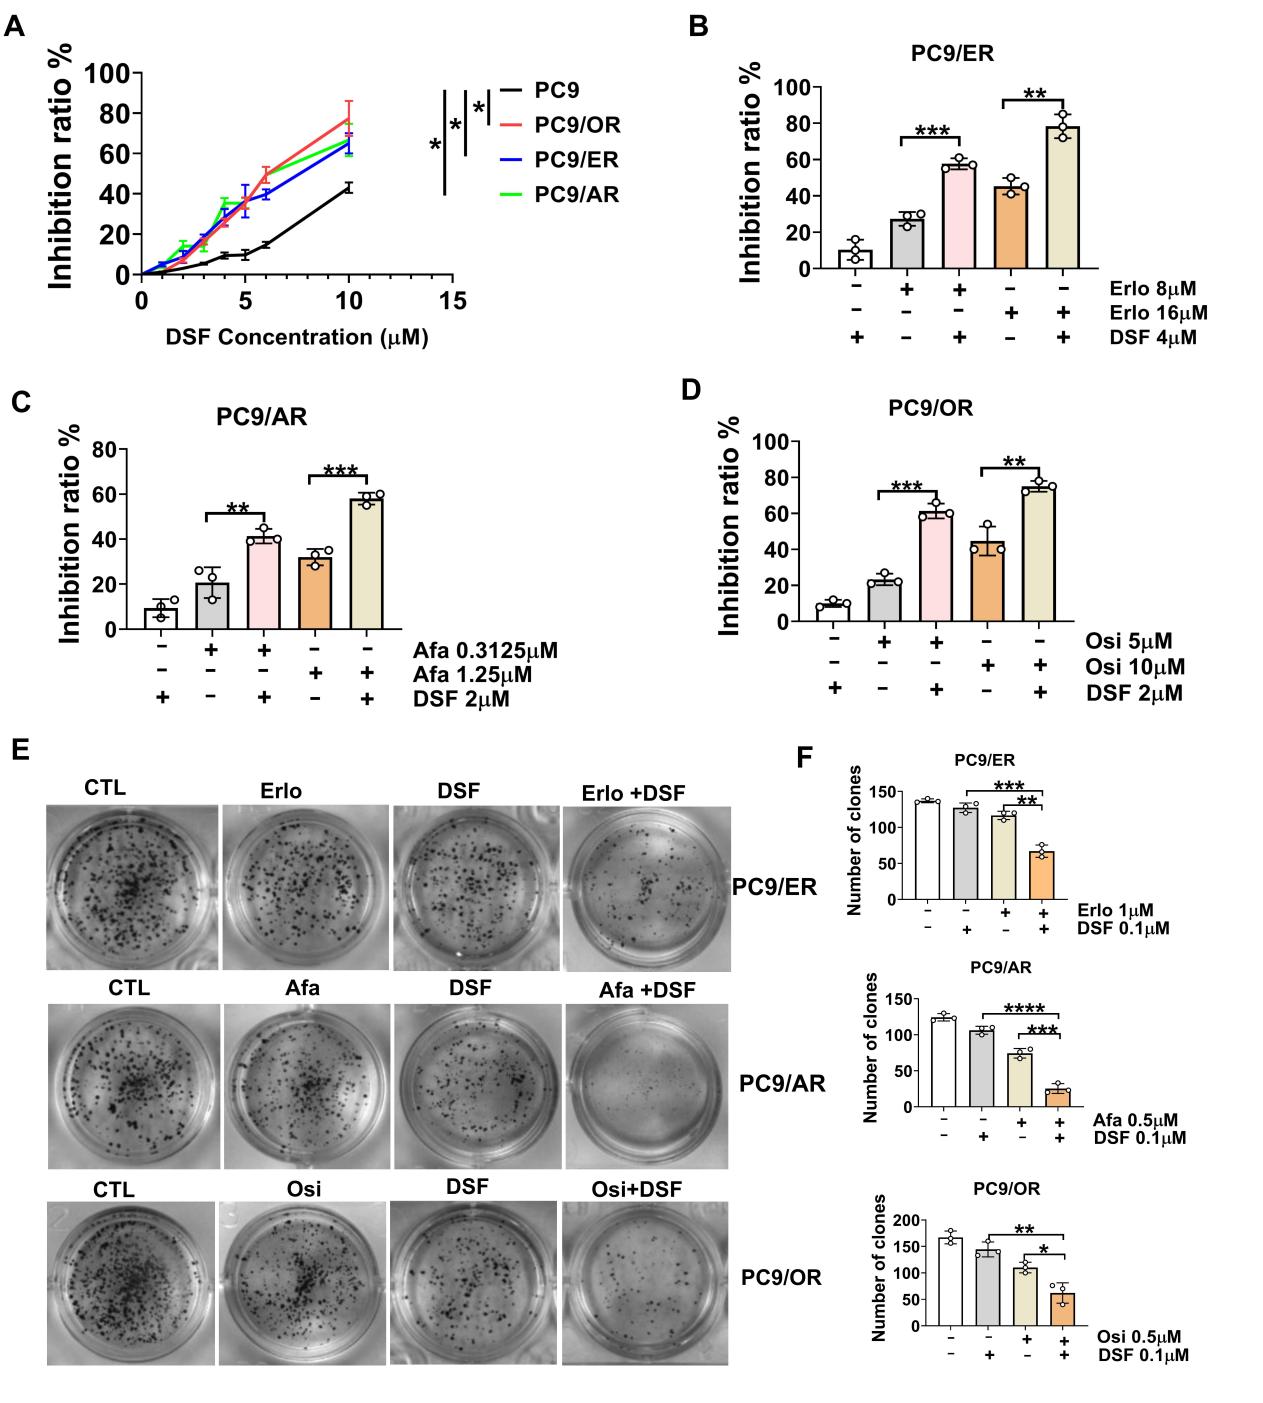


**Supplemental Figure 8. Treatment with DSF partially restores the sensitivity to EGFR-TKI in R-PC9 cells. A.** Treatment with different concentrations of DSF inhibited the proliferation of PC9 and R-PC9 cells. **B-D.** Treatment with DSF synergistically enhanced the antitumor effect of TKIs in R-PC9 cells. **E-F.** Clonal formation and quantitative analysis of the effect of DSF on the inhibition of TKIs on clonal formation inR-PC9 cells. **P*<0.05; ***P*<0.01; ****P*<0.001; *****P*<0.0001.


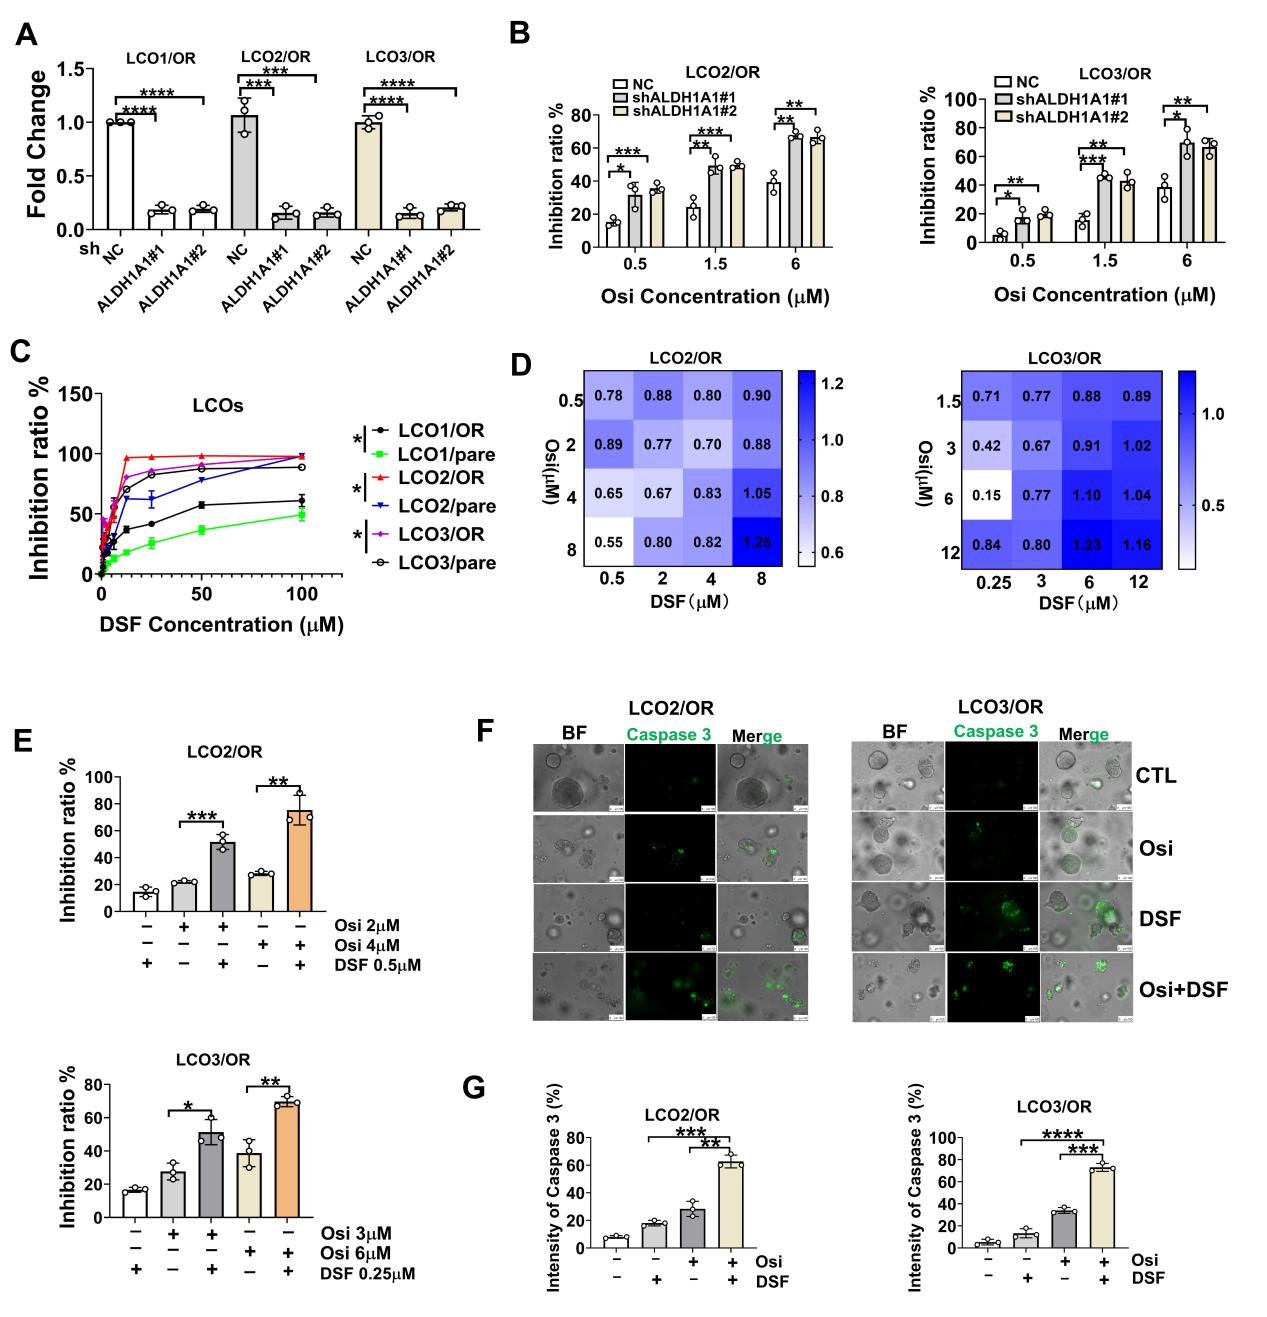


**Supplemental Figure 9. Inhibition of ALDH1A1 enhances the sensitivity to EGFR-TKIs in LCOs/OR. A.** RT-qPCR analysis of the relative levels of ALDH1A1 mRNA transcripts in LCO/OR. **B.** ALDH1A1 silencing enhanced the sensitivity to Osi in LCO2/OR and LCO3/OR. **C.** The inhibitory effect of different concentrations of DSF on LCOs and LCOs/OR cells. **D.** LCO2-3/OR were treated with different concentrations of Osi and/or DSF for 72h and cell viability was assessed by ATP assay; CI values were analyzed using CompuSyn software for non-constant drug ratio, CI <1 indicates synergism, CI > 1 indicates antagonism. **E.** Treatment with DSF enhanced the antitumor effect of Osi inLCO2-3 /OR. **F-G.** Treatment with DSF increased the Osi-up-regulated caspase3 expression in the LCO2-3/OR. **P*<0.05; ***P*<0.01; ****P*<0.001; *****P*<0.0001.


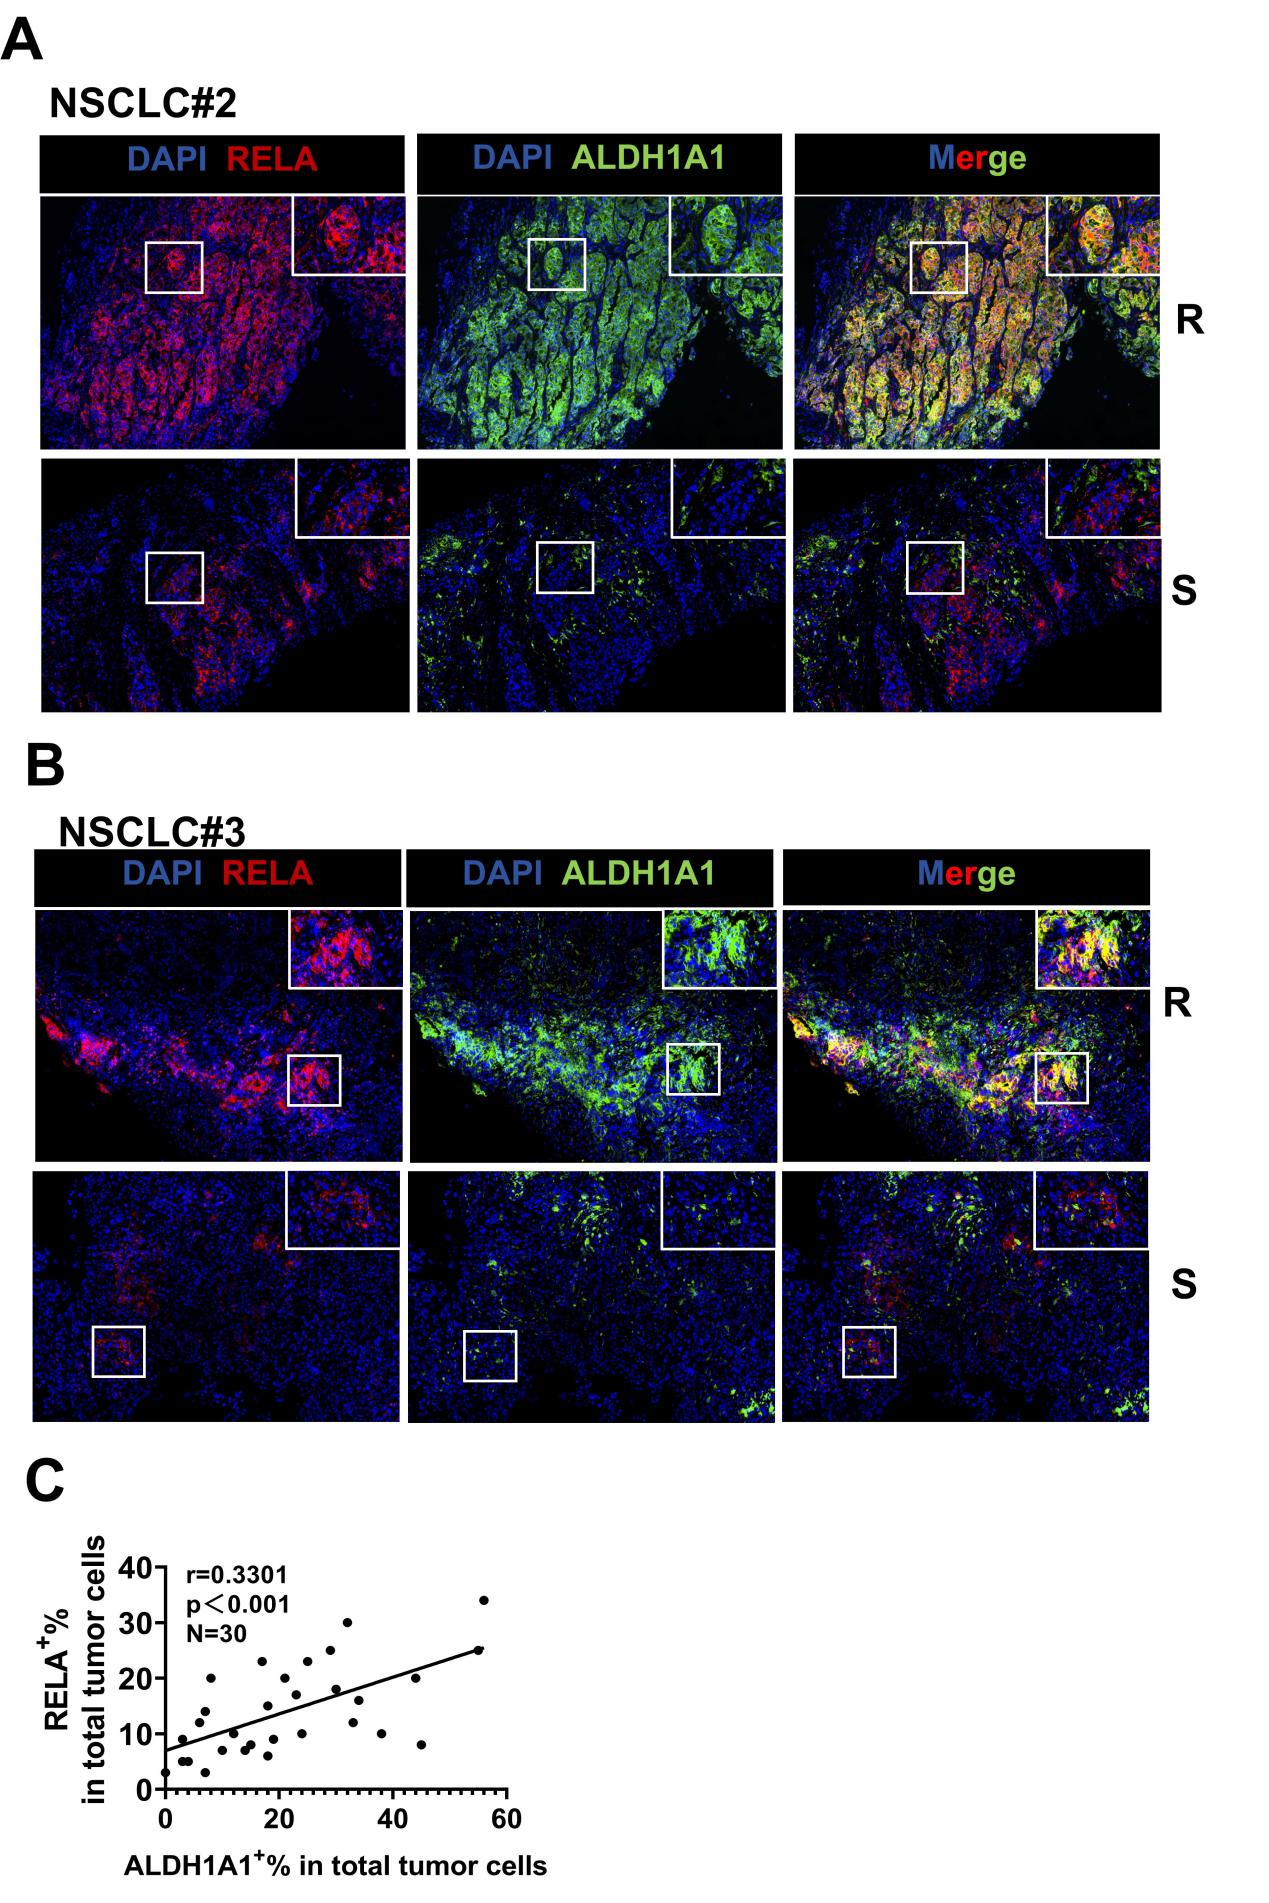


**Supplemental Figure 10. UP-regulated RELA is correlated the frequency of ALDH1+ stem-like cells in human NSCLC tissues. A-B.** Immunofluorescent analysis of ALDH1A1 and RELA expression in human TKI-sensitive or resistant NSCLC tissues (magnification x 40). The white box indicates the enlarged areas. S, sensitive; R, Resistant. **C.** The correlation between the percentages of RELA+ and ALDH1+ tumor cells in NSCLC samples (n=30).


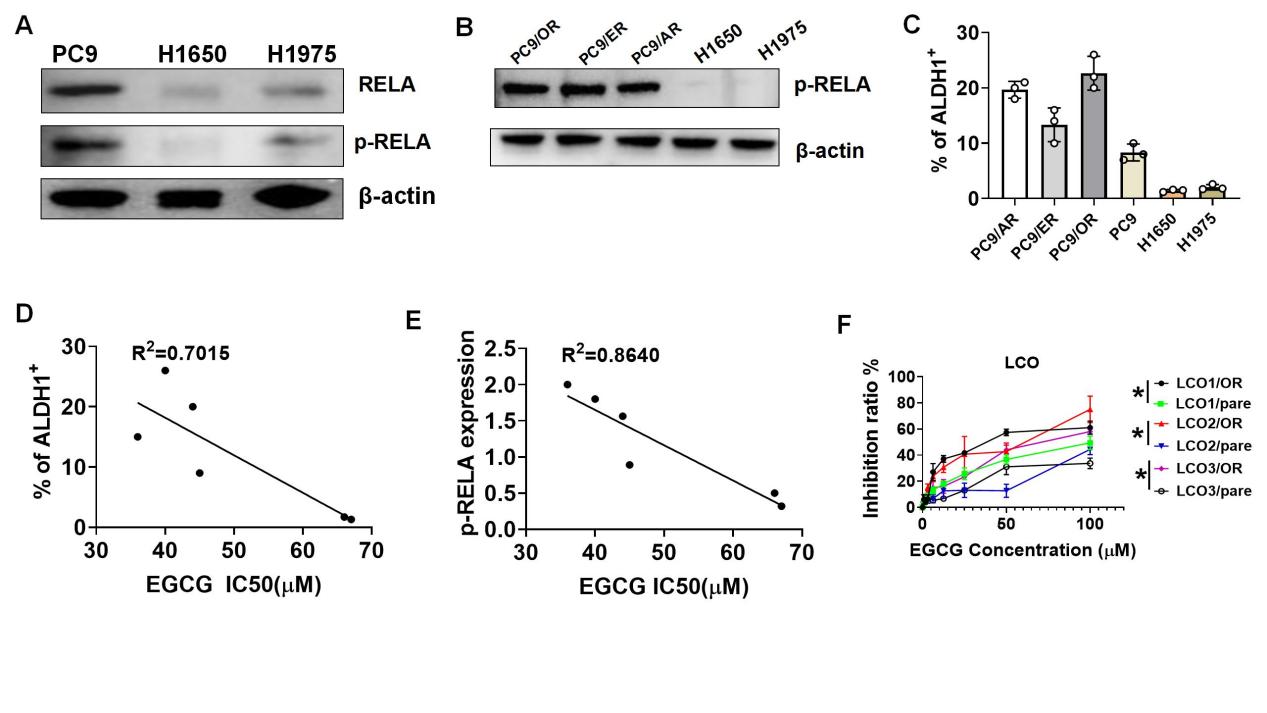


**Supplemental Figure 11. Analyzing the correlation between RELA protein expression, ALDH1A1 enzyme activity, and the IC50 values of EGCG. A.** Western blot analysis of the relative levels ofRELA expression and phosphorylation in PC9, H1650, and H1975 cells. **B**. Western blot analysis of the relative levels of RELA phosphorylation in the indicated cells. **C.** Flow cytometry was used to detect the proportion of ALDH1+ cells among PC9/OR, PC9/AR, PC9/ER, H1650, and H1975 cells. **D.** The correlation between the percentages of ALDH1+ cells and the IC50 values. **E**. The correlation between the levels of RELA phosphorylation and the IC50 values. **F**. The inhibitory effects of different concentrations of EGCG on LCOs and LCOs/OR. **P*<0.05.


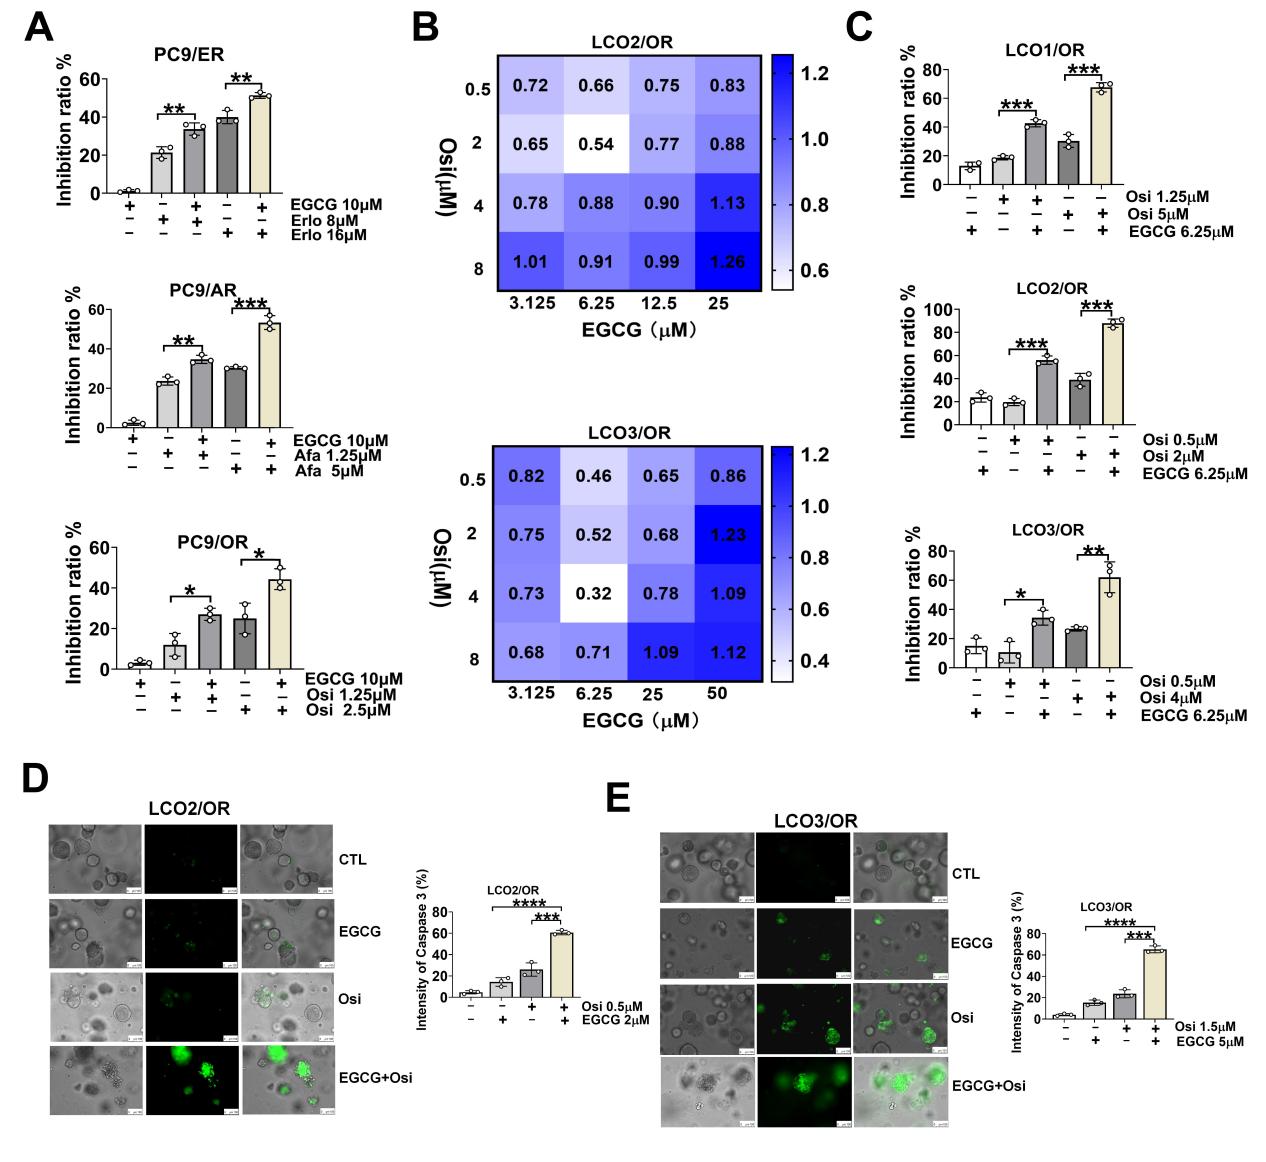


**Supplemental Figure 12. Treatment with EGCG enhances the antitumor effect of TKIs on the growth of R-PC9 and LCOs/OR. A.** Treatment with EGCG enhanced the inhibition of TKIs on the growth of R-PC9 cells. **B.** LCOs/OR cells were treated with different concentrations of Osi and/or EGCG for 72-h. The cells' viability was determined by ATP assay. CI <1 indicates synergism, CI =1 indicates additivity, CI > 1 indicates antagonism. **C.** Treatment with EGCG enhanced the inhibition of TKIs on the growth of LCOs. **D-E.** Immunofluorescence revealed that treatment with EGCG enhanced the Osi-up-regulated caspase3 expression in LCOs. ***P*<0.01; ****P*<0.001; *****P*<0.0001.


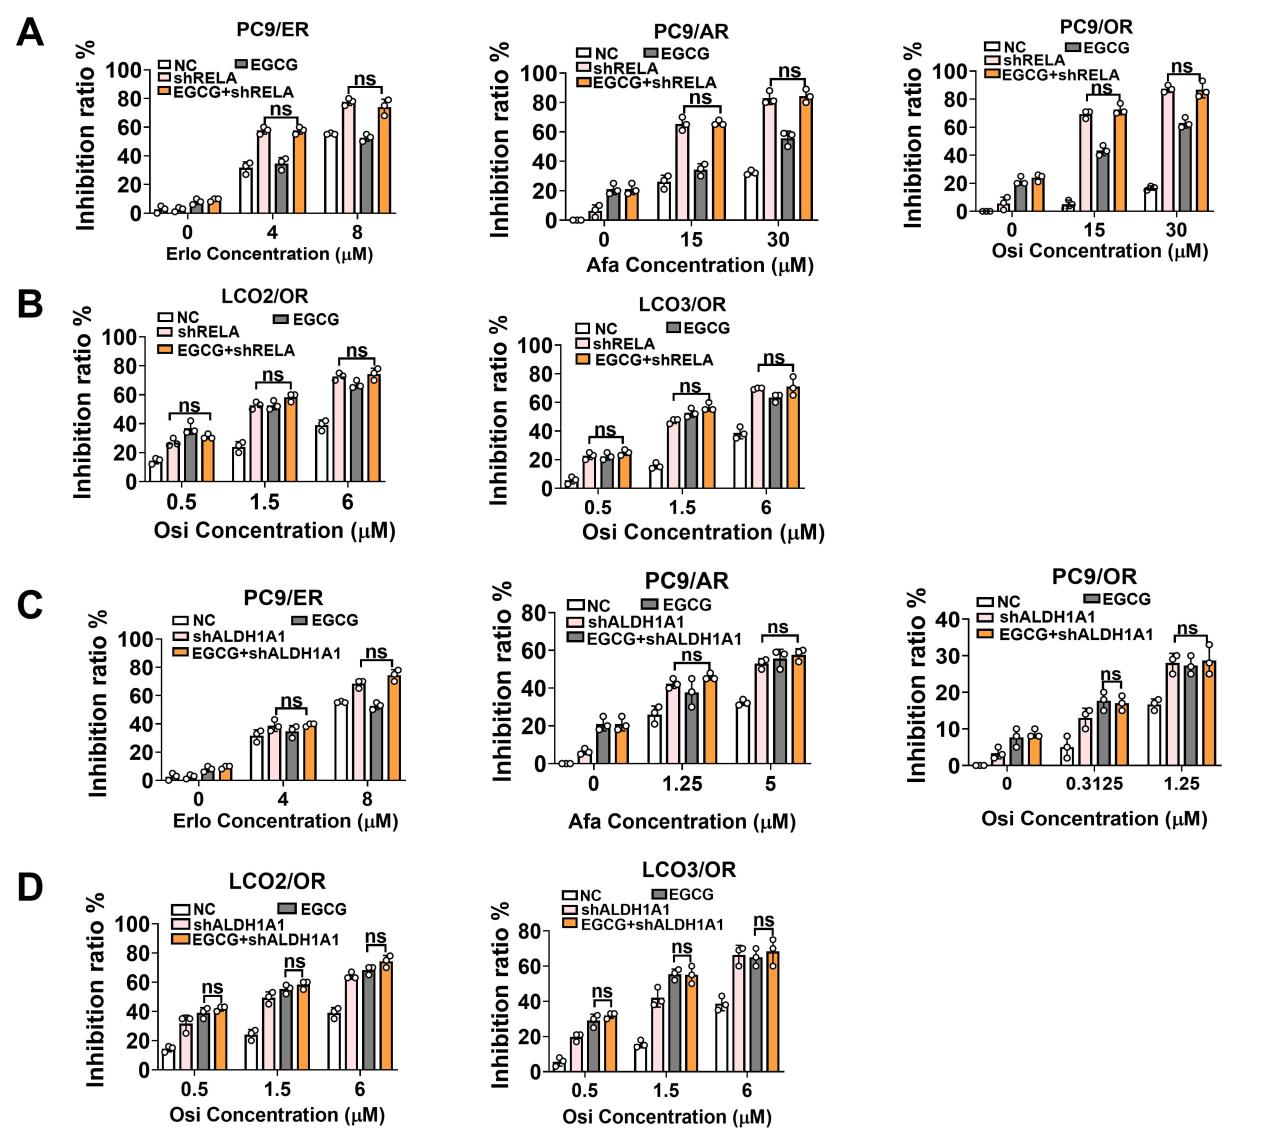


**Supplemental Figure 13. Treatment with EGCG fails to modulate the TKI-mediated inhibition on the growth of RELA-silencing R/PC9 cells and LCOs/OR. A-D.** Treatment EGCG enhanced the sensitivity to TKIs inR**-**PC9 cells and LCO2-3/OR, but not in the RELA- or ALDH1A1-silencing R-PC9 cells and LCO2-3/OR. ns, no significant.


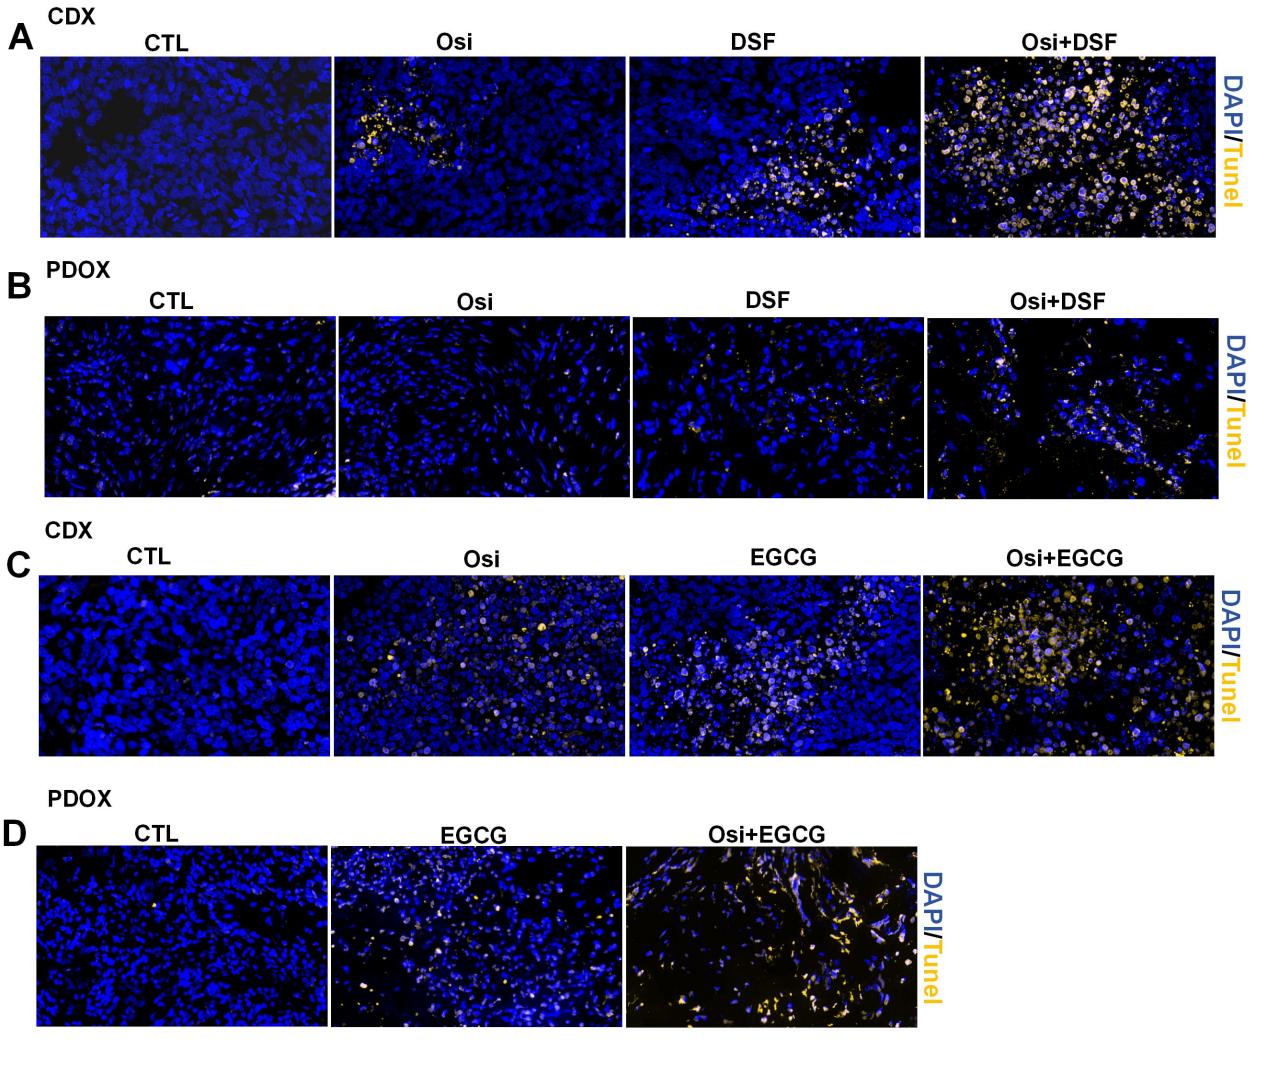


**Supplemental Figure 14. TUNEL analysis of apoptotic cells in xenograft tumors (A, C) and PDOX tumors (B, D) (Magnification x 200).**

**Supplemental Table 1. The clinicopathological characteristics of the cases and LCOs subtype**

| Oranoid  line | SEX | Age | Tumor type | Tumor location | pT | pN | cM | stage | Mutation |
| --- | --- | --- | --- | --- | --- | --- | --- | --- | --- |
|  | Female | 65 | LC | Lung | cT2a | N2 | M1a | Ⅳa | EGFR L858R |
|  | Female | 60 | LC | Lung | cT1 | N0 | M1c | Ⅳb | EGFR 19del |
|  | Male | 52 | LC | Lung | T2a | N3 | M1c | Ⅳb | EGFR L858R |
|  | Female | 69 | LC | Lung | cT4 | N3 | M1a | Ⅳ | EGFR L858R |
|  | Male | 80 | LC | Lung | cT3 | N3 | M1a | Ⅳa | EGFR L858R |
|  | Female | 67 | LC | Lung | cT2b | N2 | M1b | Ⅳa | EGFR 19del |
|  | Female | 56 | LC | Lung | pT1b | N0 | M0 | ⅠA2 | EGFR 19del |
|  | Female | 40 | LC | Lung | pT1b | N0 | M0 | ⅠA2 | EGFR L858R |
| LCO1 | Female | 56 | LC | Lung | pT2a | N0 | M0 | ⅠB | EGFR 19del |
| LCO2 | Female | 78 | LC | Lung | cT4 | N2 | M1c | Ⅳb | EGFR 19del |
| LCO3 | Male | 76 | LC | Lung | pT2a | N0 | M0 | ⅠB | EGFR 19del |
|  | Female | 74 | LC | Lung | pT2a | N2a | M0 | Ⅲa | EGFR 19del |
|  | Female | 61 | LC | Lung | pT1b | N0 | M0 | ⅠA2 | EGFR 19del |
|  | Female | 75 | LC | Lung | cT2b | N1 | M1 | ⅣA | EGFR 19del |
|  | Female | 81 | LC | Lung | pT2a | N0 | M0 | ⅠB | EGFR 19del |
|  | Female | 61 | LC | Lung | T4 | N0 | M1 | Ⅳ | EGFR 19del |
|  | Male | 66 | LC | Lung | pT1b | N0 | M0 | ⅠA2 | EGFR 19del |
|  | Male | 73 | LC | Lung | pT1b | N0 | M0 | ⅠA2 | EGFR 19del |

**Supplemental Table 2. The detailed information on antibodies**

| **Antibodies** | **Source** | **Application** |
| --- | --- | --- |
| NF-κB | Cell Signaling Technology (Cat #8242) | 1:1000 for WB  1:100 for IHC  1:100 for Chip |
| p-NF-κB | Cell Signaling Technology (Cat #3033) | 1:1000 for WB  1:1000 for IF |
| KI67 | ABclonal (Cat #A20018) | 1:200 for IF |
| MDR1 | Abcam (Cat #Ab71916) | 1:1000 for IF |
| β-actin | Abcam (Cat #Ab8146) | 1:5000 for WB |
| Lamin B | Proteintech (Cat #12987-1-AP) | 1:5000 for WB |
| CEA | Abcam (Cat #ab133633) | 1:500 for IF |
| CK20 | ABclonal (Cat #A1629) | 1:100 for IHC |
| TIFF1 | Abcam(Cat #Ab204411) | 1:500 for IHC |
| CK7 | Abcam(Cat #Ab181598) | 1:8000 for IHC |
| ALDH1A1 | ABclonal(Cat #A1802) | 1:500 for WB  1:200 for IF |
| Caspase 3 | Cell Signaling Technology (Cat #9662) | 1:1000 for WB |
| Cleaved Caspase-3 | Cell Signaling Technology (Cat #9664) | 1:1000 for WB |
| PARP | Cell Signaling Technology (Cat #9542) | 1:1000 for WB |
| Cleaved PARP | Cell Signaling Technology (Cat #5625) | 1:1000 for WB |
| PARP | Cell Signaling Technology (Cat #9532) | 1:1000 for WB |

**Supplemental Table 3: Target Sequences of lentivirus**

| **Name** | **Target sequences** |
| --- | --- |
| Negative Control Scramble | TTCTCCGAACGTGTCACGT |
| shRELA | GATTGAGGAGAAACGTAAA |
| shALDH1A1#1 | GCACCGATTTGAAGATTCAATA |
| shALDH1A1#2 | GCTGATTTAATCGAAAGAGAT |

**Supplemental Table 4 : The primers for ChIP-PCR**

| **Gene name** |  | **Sequences** |
| --- | --- | --- |
| ALDH1A1 promoter | Forward | 5’-GTCCAAACACAGAGGGAGTTG-3’ |
| Reverse | 5’-GTTTATTTACACGTGGCTTTAAACA-3’ |

**Supplemental Table 5: The sequences of primers for RT-qPCR**

| Genes | Accession # | Sequences of Primers |
| --- | --- | --- |
| GAPDH | NM_002046.7 | Forward: 5’-AAGGTGAAGGTCGGAGTCAAC-3’  Reverse: 5’-GGGGTCATTGATGGCAACAATA-3 |
| RELA | NM_001145138.2 | Forward: 5’-TGTGAAGAAGCGGGACCTGGAG-3’  Reverse: 5’-AAGCAGAGCCGCACAGCATTC-3’ |
| ABCG2 | NM_001257386.2 | Forward: 5’-GCAGCAGGTCAGAGTGTGGTTTC-3’  Reverse:5’-ACTGAAGCCATGACAGCCAAGATG-3’ |
| KLF4 | [NM_001314052.2](https://www.ncbi.nlm.nih.gov/nuccore/NM_001314052.2) | Forward: 5’-TGACTGGGACGGCTGTGGATG-3’  Reverse: 5’-CTTCATGTGTAAGGCGAGGTGGTC-3’ |
| EPCAM | [NM_002354.3](https://www.ncbi.nlm.nih.gov/nuccore/NM_002354.3) | Forward: 5’-AAGGCCAAGCAGTGCAACGG-3’  Reverse: 5’-TCCAGTAGGTTCTCACTCGCTCAG-3’ |
| SOX9 | NM_000346.4 | Forward: 5’-CACACGCTGACCACGCTGAG-3’  Reverse: 5’-GCTGCTGCTGCTCGCTGTAG-3’ |
| CD133 | NM_001145847.2 | Forward: 5’-GTGGCGTGTGCGGCTATGAC-3’  Reverse:5’-CCAACTCCAACCATGAGGAAGACG-3’ |
| AXIN2 | NM_001363813.1 | Forward: 5’-CACCACCACCACCACCATTCG-3’  Reverse:5’-ACATGCTTCGTCGTCTGCTTGG-3’ |
| ALDH1A1 | NM_000689.5 | Forward:5’-ACGCCAGACTTACCTGTCCTACTC-3’  Reverse:5’-TCTTGCCACTCACTGAATCATGCC-3’ |
| NANOG | NM_001297698.2 | Forward:5’-AGATGCCTCACACGGAGACTG-3’  Reverse:5’-GGGTTGTTTGCCTTTGGGACTG-3’ |
